# Supplementary material for: Effect of Microbial Reinforcement on Polyphenols in the Acetic Acid Fermentation of Shanxi-Aged Vinegar
Source: MDPI journal article supplement (doi:10.3390/fermentation9080756), 2023-08-14
Supplement: s1 [file s1]

## Supplementary data

Supplement Table S1

Changes of amino acid contents in the acetic acid fermentation of Shanxi aged vinegar.

| Amino acid | Content (mg/100g Vinegar fermented grains) |              |              |              |              |
|------------|--------------------------------------------|--------------|--------------|--------------|--------------|
|            | AAF 1d                                     | AAF 3d       | AAF 5d       | AAF 7d       | AAF 9d       |
| Glu        | 25.067±0.611                               | 36.911±0.732 | 42.491±0.689 | 48.971±0.554 | 54.010±0.012 |
| Gly        | 9.412±0.002                                | 10.334±0.113 | 9.093±0.211  | 10.131±0.003 | 11.402±0.124 |
| Ala        | 29.322±0.547                               | 28.393±0.598 | 35.093±0.632 | 36.813±0.715 | 38.280±0.498 |
| Val        | 20.950±0.496                               | 22.394±0.229 | 23.161±0.123 | 23.153±0.586 | 28.919±0.092 |
| Met        | 5.384±0.006                                | 5.693±0.359  | 6.782±0.218  | 6.527±0.682  | 6.897±0.159  |
| Ile        | 13.135±0.003                               | 15.251±0.025 | 17.245±0.584 | 17.827±0.129 | 18.998±0.668 |
| Leu        | 36.160±0.485                               | 40.648±0.761 | 45.988±0.661 | 48.360±0.527 | 49.397±0.573 |
| Phe        | 13.176±0.724                               | 14.516±0.157 | 13.622±0.548 | 14.269±0.224 | 15.749±0.398 |
| Thr        | 21.165±0.235                               | 26.136±0.824 | 21.697±0.817 | 19.715±0.904 | 20.768±0.700 |
| Asp        | 11.270±0.009                               | 36.415±0.001 | 35.479±0.465 | 35.164±0.398 | 37.577±0.599 |

|     |              |              |              |              |              |
|-----|--------------|--------------|--------------|--------------|--------------|
| Ser | 20.355±0.167 | 26.111±1.020 | 20.892±0.326 | 21.925±0.236 | 24.830±0.699 |
| Pro | 23.676±0.257 | 23.700±0.324 | 15.535±0.339 | 12.355±0.240 | 13.434±0.541 |
| Tyr | 6.104±0.098  | 7.216±0.054  | 7.877±0.257  | 10.460±0.281 | 11.732±0.154 |
| His | 25.135±0.480 | 24.149±0.509 | 23.600±0.138 | 25.743±0.367 | 24.810±0.684 |
| Lys | 28.904±0.831 | 22.404±0.952 | 18.833±0.157 | 20.179±0.330 | 15.639±0.601 |
| Arg | 20.575±0.021 | 42.034±0.001 | 41.268±0.414 | 43.763±0.365 | 43.853±0.209 |

---

Supplement Table S2

Changes of reducing sugar content in the acetic acid fermentation of Shanxi aged vinegar.

| Reducing sugar | Content (g/100g Vinegar fermented grains) |             |             |             |             |
|----------------|-------------------------------------------|-------------|-------------|-------------|-------------|
|                | AAF 1d                                    | AAF 3d      | AAF 5d      | AAF 7d      | AAF 9d      |
| Xylose         | 0.407±0.043                               | 0.460±0.003 | 0.433±0.056 | 0.415±0.075 | 0.615±0.055 |
| Fructose       | 0.332±0.038                               | 0.092±0.001 | 0.100±0.015 | 0.250±0.032 | 0.179±0.014 |
| Mannose        | 0.864±0.084                               | 0.488±0.048 | 1.381±0.013 | 3.588±0.035 | 5.726±0.054 |
| Glucose        | 0.073±0.004                               | 0.085±0.006 | 0.078±0.005 | 0.080±0.014 | 0.091±0.016 |
| Maltose        | 0.241±0.013                               | 0.212±0.052 | 0.212±0.034 | 0.225±0.024 | 0.259±0.011 |
| Trehalose      | 0.208±.2033                               | 0.279±0.027 | 0.389±0.038 | 0.203±0.021 | 0.003±0.003 |

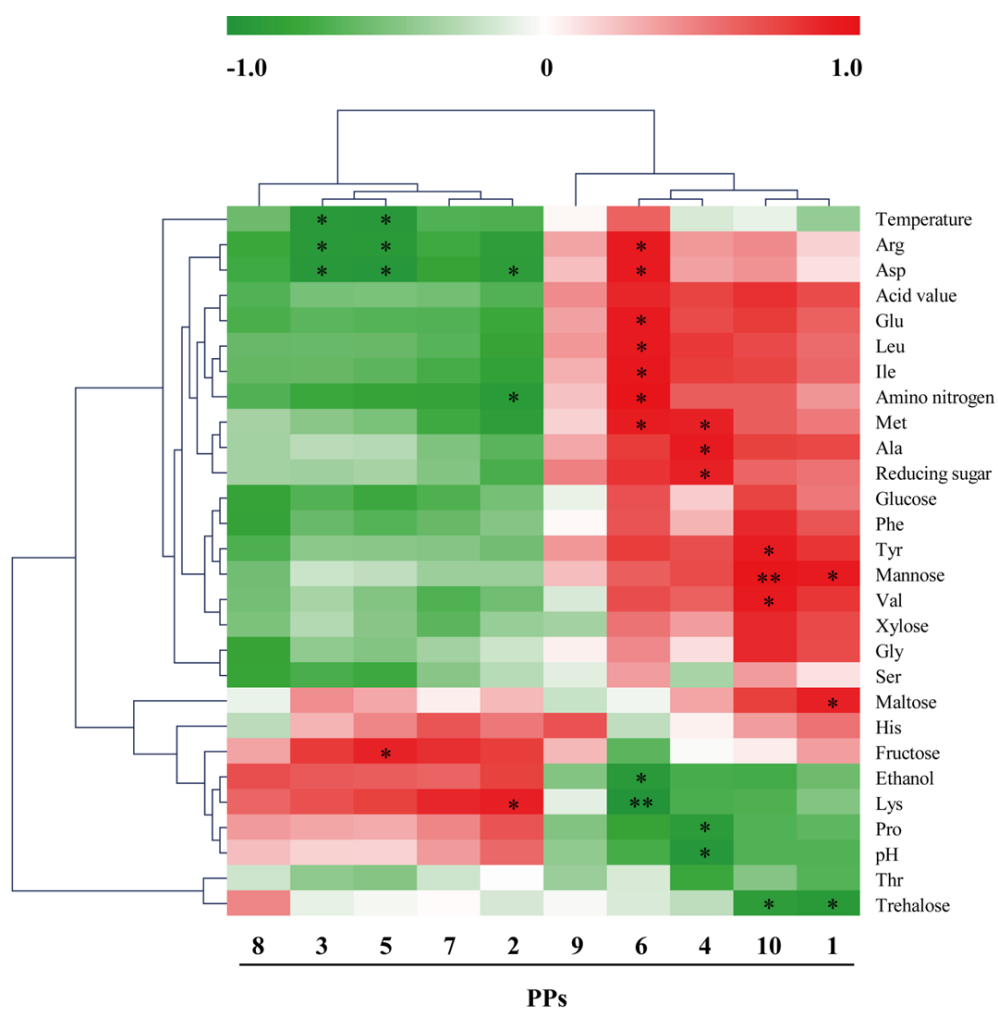

Supplement Figure S1. Spearman correlation between physicochemical and polyphenols. Red and green indicate positive correlation and negative correlation respectively, and the shadow of color indicates the correlation coefficient between environmental factors and polyphenols; \*p<0.05; \*\*p<0.01.
